# Supplementary material for: Perturbation of gut microbiota decreases susceptibility but does not modulate ongoing autoimmune neurological disease
Source: PubMed Central journal article supplement (PMC7060541; doi:10.1186/s12974-020-01766-9), 2020-03-06

Supplementary Figure 2

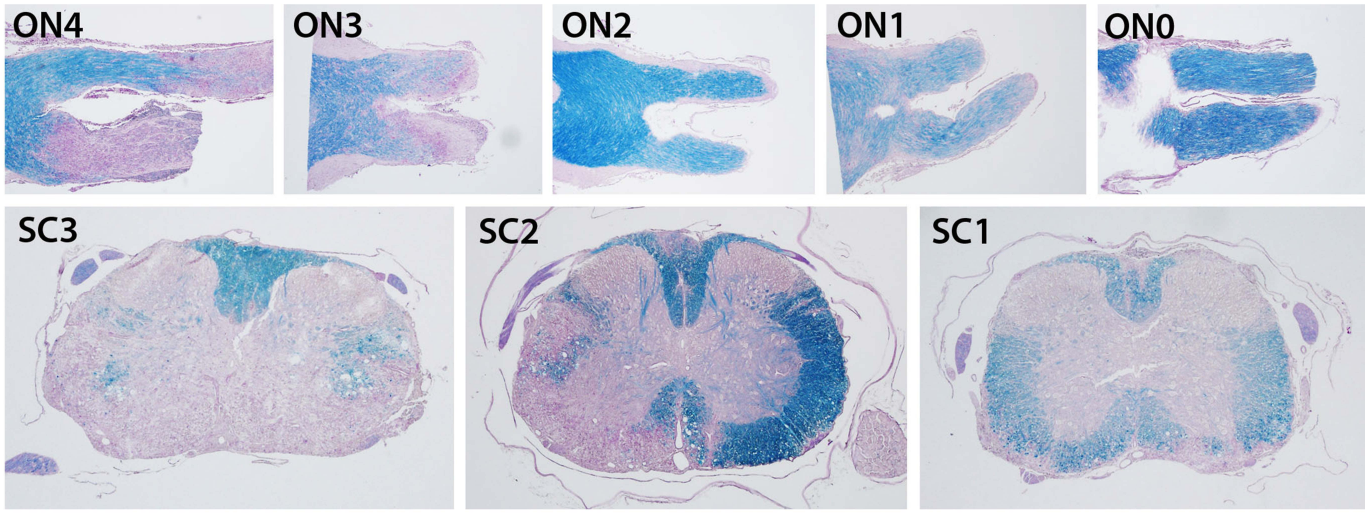

Supplement: 12974_2020_1766_MOESM2_ESM.pdf [file 12974_2020_1766_MOESM2_ESM.pdf]
