# Supplementary material for: Perturbation of gut microbiota decreases susceptibility but does not modulate ongoing autoimmune neurological disease
Source: Springer Nature journal article supplement (doi:10.1186/s12974-020-01766-9), 2020-03-06

Supplementary Figure 3

**a** **b**

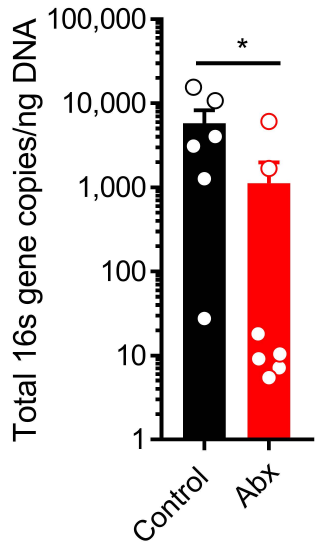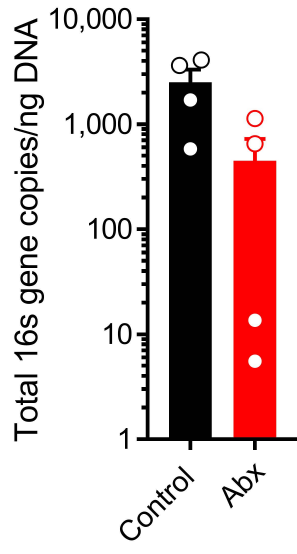

Supplement: MOESM3 [file 17778146]
